# Supplementary material for: Potato soup: analysis of cultivated potato gene bank populations reveals high diversity and little structure
Source: Frontiers journal article supplement (doi:10.3389/fpls.2024.1429279), 2024-07-18
Supplement: Data_Sheet_1.zip [file Data_Sheet_1.zip]

## Sheet: 64% coverage
selection number	GRIN_Id	plate_Id	Ploidy	species	CLONE	continent	region	status
1	AV_1	AV_1_S46_R1_001_cutadapt_bowtie2_sort_rg_marked.bam	4	tbr	ALASKA FROSTLESS	North America	US	cultivated
2	PI243421	BAO_195_S31_R1_001_cutadapt_bowtie2_sort_rg_marked.bam	4	tbr adg	CCC 269	South American	colombia	cultivated
3	PI265868	BAO_221_S46_R1_001_cutadapt_bowtie2_sort_rg_marked.bam	4	tbr adg	EBS 1816	South American	bolivia	cultivated
4	PI281060	BAO_238_S49_R1_001_cutadapt_bowtie2_sort_rg_marked.bam	4	tbr adg	WAC 206	South American	peru	cultivated
5	PI281071	BAO_246_S50_R1_001_cutadapt_bowtie2_sort_rg_marked.bam	4	tbr adg	WAC 242	South American	peru	cultivated
6	PI_518592	PI_518592_S7_R1_001_cutadapt_bowtie2_sort_rg_marked.bam	4	tbr	PAPA AMARGA	South American	uruguay	cultivated
7	PI_629020	PI_629020_S19_R1_001_cutadapt_bowtie2_sort_rg_marked.bam	4	tbr	CYNTHIA	europe	france	cultivated
8	PI_642439	PI_642439_S21_R1_001_cutadapt_bowtie2_sort_rg_marked.bam	4	tbr adg	CANASTA	South American	peru	landrace
9	PI_665406	PI_665406_S1_R1_001_cutadapt_bowtie2_sort_rg_marked.bam	4	tbr	OLALLA	europe	spain	cultivated
10	PI587067	PI587067_S47_R1_001_cutadapt_bowtie2_sort_rg_marked.bam	4	tbr	TOLLOCAN	South American	mexico	cultivated

## Sheet: 77% coverage
selection number	GRIN_Id	plate_Id	Ploidy	species	CLONE	continent	region	status
1	AV_1	AV_1_S46_R1_001_cutadapt_bowtie2_sort_rg_marked.bam	4	tbr	ALASKA FROSTLESS	North America	US	cultivated
2	AV_19	AV_19_S35_R1_001_cutadapt_bowtie2_sort_rg_marked.bam	4	tbr	KENNEBEC	North America	US	cultivated
3	AV_42	AV_42_S70_R1_001_cutadapt_bowtie2_sort_rg_marked.bam	4	tbr	EARLY BLUE	North America	US	cultivated
4	PI230471	BAO_163_S69_R1_001_cutadapt_bowtie2_sort_rg_marked.bam	4	tbr adg	IICA 3320	South American	ecuador	cultivated
5	PI243401	BAO_183_S95_R1_001_cutadapt_bowtie2_sort_rg_marked.bam	4	tbr adg	CCC 198	South American	ecuador	cultivated
6	PI243421	BAO_195_S31_R1_001_cutadapt_bowtie2_sort_rg_marked.bam	4	tbr adg	CCC 269	South American	colombia	cultivated
7	PI265868	BAO_221_S46_R1_001_cutadapt_bowtie2_sort_rg_marked.bam	4	tbr adg	EBS 1816	South American	bolivia	cultivated
8	PI280960	BAO_224_S17_R1_001_cutadapt_bowtie2_sort_rg_marked.bam	4	tbr adg	WAC 1468	South American	bolivia	cultivated
9	PI281119	BAO_267_S82_R1_001_cutadapt_bowtie2_sort_rg_marked.bam	4	tbr adg	WAC 370	South American	peru	cultivated
10	PI473247	BAO_296_S26_R1_001_cutadapt_bowtie2_sort_rg_marked.bam	4	tbr adg	OKA 3872	South American	argentina	cultivated
11	PI473259	BAO_300_S3_R1_001_cutadapt_bowtie2_sort_rg_marked.bam	4	tbr adg	HOF 2010	South American	argentina	cultivated
12	PI583339	BAO_337_S78_R1_001_cutadapt_bowtie2_sort_rg_marked.bam	4	tbr	CIP 391056	South American	peru	cultivated
13	PI595458	BAO_350_S63_R1_001_cutadapt_bowtie2_sort_rg_marked.bam	4	tbr tbr	CON 925	South American	chile	cultivated
14	KBLV_56-33	KBLV_56-33_S53_R1_001_cutadapt_bowtie2_sort_rg_marked.bam	2	blv	HHCH5058	South American	peru	wild
15	PI_349776	PI_349776_S90_R1_001_cutadapt_bowtie2_sort_rg_marked.bam	4	tbr	ISLA CAUCAHUA	europe	Russia	cultivated
16	PI_518592	PI_518592_S7_R1_001_cutadapt_bowtie2_sort_rg_marked.bam	4	tbr	PAPA AMARGA	South American	uruguay	cultivated
17	PI_595425	PI_595425_S1_R1_001_cutadapt_bowtie2_sort_rg_marked.bam	4	tbr	MARIJKE	europe	netherlands	cultivated
18	PI_611072	PI_611072_S91_R1_001_cutadapt_bowtie2_sort_rg_marked.bam	4	tbr adg	YANA IMILLA	South American	peru	landrace
19	PI_642439	PI_642439_S21_R1_001_cutadapt_bowtie2_sort_rg_marked.bam	4	tbr adg	CANASTA	South American	peru	landrace
20	PI587067	PI587067_S47_R1_001_cutadapt_bowtie2_sort_rg_marked.bam	4	tbr	TOLLOCAN	South American	mexico	cultivated

## Sheet: 84% coverage
selection number	GRIN_Id	plate_Id	Ploidy	species	CLONE	continent	region	status
1	AV_1	AV_1_S46_R1_001_cutadapt_bowtie2_sort_rg_marked.bam	4	tbr	ALASKA FROSTLESS	North America	US	cultivated
2	AV_23	AV_23_S56_R1_001_cutadapt_bowtie2_sort_rg_marked.bam	4	tbr	NORGOLD RUSSET	North America	US	cultivated
3	AV_42	AV_42_S70_R1_001_cutadapt_bowtie2_sort_rg_marked.bam	4	tbr	EARLY BLUE	North America	US	cultivated
4	AV_61	AV_61_S59_R1_001_cutadapt_bowtie2_sort_rg_marked.bam	4	tbr	PUNGO	North America	US	cultivated
5	PI642446	BAO_067_S56_R1_001_cutadapt_bowtie2_sort_rg_marked.bam	4	tbr adg	OKELLA QUEHUILLO	South American	peru	landrace
6	PI246554	BAO_095_S83_R1_001_cutadapt_bowtie2_sort_rg_marked.bam	4	tbr adg	COR P.256	South American	peru	cultivated
7	PI214435	BAO_096_S1_R1_001_cutadapt_bowtie2_sort_rg_marked.bam	4	tbr adg	SMI 465	South American	peru	cultivated
8	PI205624	BAO_136_S6_R1_001_cutadapt_bowtie2_sort_rg_marked.bam	4	tbr adg	CPC 2201 (85)	South American	peru	cultivated
9	PI230457	BAO_161_S57_R1_001_cutadapt_bowtie2_sort_rg_marked.bam	4	tbr adg	CPC 1464	South American	peru	cultivated
10	PI230471	BAO_163_S69_R1_001_cutadapt_bowtie2_sort_rg_marked.bam	4	tbr adg	IICA 3320	South American	ecuador	cultivated
11	PI243396	BAO_180_S77_R1_001_cutadapt_bowtie2_sort_rg_marked.bam	4	tbr adg	CCC 162	South American	colombia	cultivated
12	PI243409	BAO_191_S7_R1_001_cutadapt_bowtie2_sort_rg_marked.bam	4	tbr adg	CCC 210	South American	ecuador	cultivated
13	PI243421	BAO_195_S31_R1_001_cutadapt_bowtie2_sort_rg_marked.bam	4	tbr adg	CCC 269	South American	colombia	cultivated
14	PI265868	BAO_221_S46_R1_001_cutadapt_bowtie2_sort_rg_marked.bam	4	tbr adg	EBS 1816	South American	bolivia	cultivated
15	PI280886	BAO_222_S5_R1_001_cutadapt_bowtie2_sort_rg_marked.bam	4	tbr adg	WAC 156	South American	bolivia	cultivated
16	PI280960	BAO_224_S17_R1_001_cutadapt_bowtie2_sort_rg_marked.bam	4	tbr adg	WAC 1468	South American	bolivia	cultivated
17	PI281119	BAO_267_S82_R1_001_cutadapt_bowtie2_sort_rg_marked.bam	4	tbr adg	WAC 370	South American	peru	cultivated
18	PI365372	BAO_292_S2_R1_001_cutadapt_bowtie2_sort_rg_marked.bam	4	tbr adg	OCH SC-96	South American	peru	cultivated
19	PI473247	BAO_296_S26_R1_001_cutadapt_bowtie2_sort_rg_marked.bam	4	tbr adg	OKA 3872	South American	argentina	cultivated
20	PI473259	BAO_300_S3_R1_001_cutadapt_bowtie2_sort_rg_marked.bam	4	tbr adg	HOF 2010	South American	argentina	cultivated
21	PI583340	BAO_338_S83_R1_001_cutadapt_bowtie2_sort_rg_marked.bam	4	tbr	CIP 391057	South American	peru	cultivated
22	PI595458	BAO_350_S63_R1_001_cutadapt_bowtie2_sort_rg_marked.bam	4	tbr tbr	CON 925	South American	chile	cultivated
23	KBLV_56-37	KBLV_56-37_S65_R1_001_cutadapt_bowtie2_sort_rg_marked.bam	2	blv	HHCH5058	South American	peru	wild
24	PI_199102	PI_199102_S24_R1_001_cutadapt_bowtie2_sort_rg_marked.bam	4	tbr	VICTOR	europe	spain	cultivated
25	PI_239567	PI_239567_S9_R1_001_cutadapt_bowtie2_sort_rg_marked.bam	4	tbr	SIEGLINDE	europe	Austria	cultivated
26	PI_518592	PI_518592_S7_R1_001_cutadapt_bowtie2_sort_rg_marked.bam	4	tbr	PAPA AMARGA	South American	uruguay	cultivated
27	PI_587051	PI_587051_S42_R1_001_cutadapt_bowtie2_sort_rg_marked.bam	4	tbr	CORINE	europe	netherlands	cultivated
28	PI_611072	PI_611072_S91_R1_001_cutadapt_bowtie2_sort_rg_marked.bam	4	tbr adg	YANA IMILLA	South American	peru	landrace
29	PI_642441	PI_642441_S2_R1_001_cutadapt_bowtie2_sort_rg_marked.bam	4	tbr adg	HUICHIRI	South American	peru	landrace
30	PI619141	PI619141_S7_R1_001_cutadapt_bowtie2_sort_rg_marked.bam	4	tbr adg	HUAGALINA.1	South American	peru	landrace

## Sheet: 89% coverage
selection number	GRIN_Id	plate_Id	Ploidy	species	CLONE	continent	region	status
1	AV_1	AV_1_S46_R1_001_cutadapt_bowtie2_sort_rg_marked.bam	4	tbr	ALASKA FROSTLESS	North America	US	cultivated
2	AV_23	AV_23_S56_R1_001_cutadapt_bowtie2_sort_rg_marked.bam	4	tbr	NORGOLD RUSSET	North America	US	cultivated
3	AV_42	AV_42_S70_R1_001_cutadapt_bowtie2_sort_rg_marked.bam	4	tbr	EARLY BLUE	North America	US	cultivated
4	AV_68	AV_68_S22_R1_001_cutadapt_bowtie2_sort_rg_marked.bam	4	tbr	PETER WILCOX	North America	US	cultivated
5	PI642439	BAO_063_S79_R1_001_cutadapt_bowtie2_sort_rg_marked.bam	4	tbr adg	CANASTA	South American	peru	landrace
6	PI642446	BAO_067_S56_R1_001_cutadapt_bowtie2_sort_rg_marked.bam	4	tbr adg	OKELLA QUEHUILLO	South American	peru	landrace
7	PI246554	BAO_095_S83_R1_001_cutadapt_bowtie2_sort_rg_marked.bam	4	tbr adg	COR P.256	South American	peru	cultivated
8	PI205624	BAO_136_S6_R1_001_cutadapt_bowtie2_sort_rg_marked.bam	4	tbr adg	CPC 2201 (85)	South American	peru	cultivated
9	PI230457	BAO_161_S57_R1_001_cutadapt_bowtie2_sort_rg_marked.bam	4	tbr adg	CPC 1464	South American	peru	cultivated
10	PI230471	BAO_163_S69_R1_001_cutadapt_bowtie2_sort_rg_marked.bam	4	tbr adg	IICA 3320	South American	ecuador	cultivated
11	PI243366	BAO_179_S71_R1_001_cutadapt_bowtie2_sort_rg_marked.bam	4	tbr adg	CCC 27	South American	colombia	cultivated
12	PI243401	BAO_183_S95_R1_001_cutadapt_bowtie2_sort_rg_marked.bam	4	tbr adg	CCC 198	South American	ecuador	cultivated
13	PI243403	BAO_185_S60_R1_001_cutadapt_bowtie2_sort_rg_marked.bam	4	tbr adg	CCC 201	South American	ecuador	cultivated
14	PI243421	BAO_195_S31_R1_001_cutadapt_bowtie2_sort_rg_marked.bam	4	tbr adg	CCC 269	South American	colombia	cultivated
15	PI265868	BAO_221_S46_R1_001_cutadapt_bowtie2_sort_rg_marked.bam	4	tbr adg	EBS 1816	South American	bolivia	cultivated
16	PI280960	BAO_224_S17_R1_001_cutadapt_bowtie2_sort_rg_marked.bam	4	tbr adg	WAC 1468	South American	bolivia	cultivated
17	PI280998	BAO_228_S41_R1_001_cutadapt_bowtie2_sort_rg_marked.bam	4	tbr adg	WAC 741	South American	bolivia	cultivated
18	PI281046	BAO_236_S42_R1_001_cutadapt_bowtie2_sort_rg_marked.bam	4	tbr adg	WAC 168	South American	peru	cultivated
19	PI281119	BAO_267_S82_R1_001_cutadapt_bowtie2_sort_rg_marked.bam	4	tbr adg	WAC 370	South American	peru	cultivated
20	PI365372	BAO_292_S2_R1_001_cutadapt_bowtie2_sort_rg_marked.bam	4	tbr adg	OCH SC-96	South American	peru	cultivated
21	PI473247	BAO_296_S26_R1_001_cutadapt_bowtie2_sort_rg_marked.bam	4	tbr adg	OKA 3872	South American	argentina	cultivated
22	PI473259	BAO_300_S3_R1_001_cutadapt_bowtie2_sort_rg_marked.bam	4	tbr adg	HOF 2010	South American	argentina	cultivated
23	PI473393	BAO_312_S28_R1_001_cutadapt_bowtie2_sort_rg_marked.bam	4	tbr adg	HHCH 4598	South American	bolivia	cultivated
24	PI546025	BAO_320_S29_R1_001_cutadapt_bowtie2_sort_rg_marked.bam	4	tbr adg	HOHL 259	South American	bolivia	cultivated
25	PI584496	BAO_344_S73_R1_001_cutadapt_bowtie2_sort_rg_marked.bam	4	tbr	CIP 391048	South American	peru	cultivated
26	PI590927	BAO_347_S90_R1_001_cutadapt_bowtie2_sort_rg_marked.bam	4	tbr	CIP 391007	South American	peru	cultivated
27	PI595458	BAO_350_S63_R1_001_cutadapt_bowtie2_sort_rg_marked.bam	4	tbr tbr	CON 925	South American	chile	cultivated
28	PI607886	BAO_352_S74_R1_001_cutadapt_bowtie2_sort_rg_marked.bam	4	tbr adg	SS 7223	South American	peru	cultivated
29	GS_23	GS_23_S3_R1_001_cutadapt_bowtie2_sort_rg_marked.bam	4	tbr	US-W 4519-MERRIMACK	North America	US	cultivated
30	KBLV_56-37	KBLV_56-37_S65_R1_001_cutadapt_bowtie2_sort_rg_marked.bam	2	blv	HHCH5058	South American	peru	wild
31	PI_199102	PI_199102_S24_R1_001_cutadapt_bowtie2_sort_rg_marked.bam	4	tbr	VICTOR	europe	spain	cultivated
32	PI_199285	PI_199285_S80_R1_001_cutadapt_bowtie2_sort_rg_marked.bam	4	tbr	FRUHPERLE	europe	germany	cultivated
33	PI_239567	PI_239567_S9_R1_001_cutadapt_bowtie2_sort_rg_marked.bam	4	tbr	SIEGLINDE	europe	Austria	cultivated
34	PI_475776	PI_475776_S72_R1_001_cutadapt_bowtie2_sort_rg_marked.bam	4	tbr	PENTLAND ACE	europe	UK	cultivated
35	PI_518592	PI_518592_S7_R1_001_cutadapt_bowtie2_sort_rg_marked.bam	4	tbr	PAPA AMARGA	South American	uruguay	cultivated
36	PI_587051	PI_587051_S42_R1_001_cutadapt_bowtie2_sort_rg_marked.bam	4	tbr	CORINE	europe	netherlands	cultivated
37	PI_642438	PI_642438_S37_R1_001_cutadapt_bowtie2_sort_rg_marked.bam	4	tbr adg	ALCCA IMILLA	South American	peru	landrace
38	PI_666963	PI_666963_S16_R1_001_cutadapt_bowtie2_sort_rg_marked.bam	4	tbr	SANTE	europe	netherlands	cultivated
39	PI595438	PI595438_S35_R1_001_cutadapt_bowtie2_sort_rg_marked.bam	2	juz	AZUL LUK'I.1	South American	bolivia	landrace
40	PI619141	PI619141_S7_R1_001_cutadapt_bowtie2_sort_rg_marked.bam	4	tbr adg	HUAGALINA.1	South American	peru	landrace

## Sheet: 91% coverage
selection number	GRIN_Id	plate_Id	Ploidy	species	CLONE	continent	region	status
1	AV_1	AV_1_S46_R1_001_cutadapt_bowtie2_sort_rg_marked.bam	4	tbr	ALASKA FROSTLESS	North America	US	cultivated
2	AV_23	AV_23_S56_R1_001_cutadapt_bowtie2_sort_rg_marked.bam	4	tbr	NORGOLD RUSSET	North America	US	cultivated
3	AV_42	AV_42_S70_R1_001_cutadapt_bowtie2_sort_rg_marked.bam	4	tbr	EARLY BLUE	North America	US	cultivated
4	AV_68	AV_68_S22_R1_001_cutadapt_bowtie2_sort_rg_marked.bam	4	tbr	PETER WILCOX	North America	US	cultivated
5	PI595438	BAO_052_S66_R1_001_cutadapt_bowtie2_sort_rg_marked.bam	2	juz	AZUL LUK'I	South American	bolivia	landrace
6	PI246554	BAO_095_S83_R1_001_cutadapt_bowtie2_sort_rg_marked.bam	4	tbr adg	COR P.256	South American	peru	cultivated
7	PI245783	BAO_098_S13_R1_001_cutadapt_bowtie2_sort_rg_marked.bam	4	tbr adg	COR C.43	South American	peru	cultivated
8	PI205624	BAO_136_S6_R1_001_cutadapt_bowtie2_sort_rg_marked.bam	4	tbr adg	CPC 2201 (85)	South American	peru	cultivated
9	PI214443	BAO_148_S73_R1_001_cutadapt_bowtie2_sort_rg_marked.bam	4	tbr adg	SMI 505	South American	peru	cultivated
10	PI230457	BAO_161_S57_R1_001_cutadapt_bowtie2_sort_rg_marked.bam	4	tbr adg	CPC 1464	South American	peru	cultivated
11	PI230471	BAO_163_S69_R1_001_cutadapt_bowtie2_sort_rg_marked.bam	4	tbr adg	IICA 3320	South American	ecuador	cultivated
12	PI243366	BAO_179_S71_R1_001_cutadapt_bowtie2_sort_rg_marked.bam	4	tbr adg	CCC 27	South American	colombia	cultivated
13	PI243396	BAO_180_S77_R1_001_cutadapt_bowtie2_sort_rg_marked.bam	4	tbr adg	CCC 162	South American	colombia	cultivated
14	PI243401	BAO_183_S95_R1_001_cutadapt_bowtie2_sort_rg_marked.bam	4	tbr adg	CCC 198	South American	ecuador	cultivated
15	PI243421	BAO_195_S31_R1_001_cutadapt_bowtie2_sort_rg_marked.bam	4	tbr adg	CCC 269	South American	colombia	cultivated
16	PI246518	BAO_206_S3_R1_001_cutadapt_bowtie2_sort_rg_marked.bam	4	tbr adg	COR P.205B	South American	peru	cultivated
17	PI255494	BAO_214_S4_R1_001_cutadapt_bowtie2_sort_rg_marked.bam	4	tbr adg	CEEA 19	South American	bolivia	cultivated
18	PI265868	BAO_221_S46_R1_001_cutadapt_bowtie2_sort_rg_marked.bam	4	tbr adg	EBS 1816	South American	bolivia	cultivated
19	PI280886	BAO_222_S5_R1_001_cutadapt_bowtie2_sort_rg_marked.bam	4	tbr adg	WAC 156	South American	bolivia	cultivated
20	PI280960	BAO_224_S17_R1_001_cutadapt_bowtie2_sort_rg_marked.bam	4	tbr adg	WAC 1468	South American	bolivia	cultivated
21	PI280998	BAO_228_S41_R1_001_cutadapt_bowtie2_sort_rg_marked.bam	4	tbr adg	WAC 741	South American	bolivia	cultivated
22	PI281046	BAO_236_S42_R1_001_cutadapt_bowtie2_sort_rg_marked.bam	4	tbr adg	WAC 168	South American	peru	cultivated
23	PI281101	BAO_262_S52_R1_001_cutadapt_bowtie2_sort_rg_marked.bam	4	tbr adg	WAC 313	South American	peru	cultivated
24	PI281107	BAO_264_S64_R1_001_cutadapt_bowtie2_sort_rg_marked.bam	4	tbr adg	WAC 336	South American	peru	cultivated
25	PI281119	BAO_267_S82_R1_001_cutadapt_bowtie2_sort_rg_marked.bam	4	tbr adg	WAC 370	South American	peru	cultivated
26	PI292078	BAO_274_S77_R1_001_cutadapt_bowtie2_sort_rg_marked.bam	4	tbr adg	UGN 5257	South American	peru	cultivated
27	PI365372	BAO_292_S2_R1_001_cutadapt_bowtie2_sort_rg_marked.bam	4	tbr adg	OCH SC-96	South American	peru	cultivated
28	PI473247	BAO_296_S26_R1_001_cutadapt_bowtie2_sort_rg_marked.bam	4	tbr adg	OKA 3872	South American	argentina	cultivated
29	PI473259	BAO_300_S3_R1_001_cutadapt_bowtie2_sort_rg_marked.bam	4	tbr adg	HOF 2010	South American	argentina	cultivated
30	PI473393	BAO_312_S28_R1_001_cutadapt_bowtie2_sort_rg_marked.bam	4	tbr adg	HHCH 4598	South American	bolivia	cultivated
31	PI546025	BAO_320_S29_R1_001_cutadapt_bowtie2_sort_rg_marked.bam	4	tbr adg	HOHL 259	South American	bolivia	cultivated
32	PI558144	BAO_323_S47_R1_001_cutadapt_bowtie2_sort_rg_marked.bam	4	tbr adg	OKA 7599	South American	argentina	cultivated
33	PI584496	BAO_344_S73_R1_001_cutadapt_bowtie2_sort_rg_marked.bam	4	tbr	CIP 391048	South American	peru	cultivated
34	PI590927	BAO_347_S90_R1_001_cutadapt_bowtie2_sort_rg_marked.bam	4	tbr	CIP 391007	South American	peru	cultivated
35	PI595458	BAO_350_S63_R1_001_cutadapt_bowtie2_sort_rg_marked.bam	4	tbr tbr	CON 925	South American	chile	cultivated
36	PI607886	BAO_352_S74_R1_001_cutadapt_bowtie2_sort_rg_marked.bam	4	tbr adg	SS 7223	South American	peru	cultivated
37	PI619141	BAO032_S93_R1_001_cutadapt_bowtie2_sort_rg_marked.bam	4	tbr adg	HUAGALINA	South American	peru	landrace
38	GS_23	GS_23_S3_R1_001_cutadapt_bowtie2_sort_rg_marked.bam	4	tbr	US-W 4519-MERRIMACK	North America	US	cultivated
39	KBLV_56-43	KBLV_56-43_S54_R1_001_cutadapt_bowtie2_sort_rg_marked.bam	2	blv	HHCH5058	South American	peru	wild
40	PI_199102	PI_199102_S24_R1_001_cutadapt_bowtie2_sort_rg_marked.bam	4	tbr	VICTOR	europe	spain	cultivated
41	PI_199285	PI_199285_S80_R1_001_cutadapt_bowtie2_sort_rg_marked.bam	4	tbr	FRUHPERLE	europe	germany	cultivated
42	PI_239567	PI_239567_S9_R1_001_cutadapt_bowtie2_sort_rg_marked.bam	4	tbr	SIEGLINDE	europe	Austria	cultivated
43	PI_451705	PI_451705_S65_R1_001_cutadapt_bowtie2_sort_rg_marked.bam	4	tbr	MARIS BARD	europe	UK	cultivated
44	PI_518592	PI_518592_S7_R1_001_cutadapt_bowtie2_sort_rg_marked.bam	4	tbr	PAPA AMARGA	South American	uruguay	cultivated
45	PI_527977	PI_527977_S82_R1_001_cutadapt_bowtie2_sort_rg_marked.bam	4	tbr	LOW BAY	South American	chile	landrace
46	PI_587051	PI_587051_S42_R1_001_cutadapt_bowtie2_sort_rg_marked.bam	4	tbr	CORINE	europe	netherlands	cultivated
47	PI_642441	PI_642441_S2_R1_001_cutadapt_bowtie2_sort_rg_marked.bam	4	tbr adg	HUICHIRI	South American	peru	landrace
48	PI_642446	PI_642446_S20_R1_001_cutadapt_bowtie2_sort_rg_marked.bam	4	tbr adg	OKELLA QUEHUILLO	South American	peru	landrace
49	PI_666963	PI_666963_S16_R1_001_cutadapt_bowtie2_sort_rg_marked.bam	4	tbr	SANTE	europe	netherlands	cultivated
50	PI587067	PI587067_S47_R1_001_cutadapt_bowtie2_sort_rg_marked.bam	4	tbr	TOLLOCAN	South American	mexico	cultivated

## Sheet: 97% coverage
selection number	GRIN_Id	plate_Id	Ploidy	species	CLONE	continent	region	status
1	AV_1	AV_1_S46_R1_001_cutadapt_bowtie2_sort_rg_marked.bam	4	tbr	ALASKA FROSTLESS	North America	US	cultivated
2	AV_11	AV_11_S5_R1_001_cutadapt_bowtie2_sort_rg_marked.bam	4	tbr	EARLY OHIO	North America	US	cultivated
3	AV_32	AV_32_S51_R1_001_cutadapt_bowtie2_sort_rg_marked.bam	4	tbr	SACO	North America	US	cultivated
4	AV_42	AV_42_S70_R1_001_cutadapt_bowtie2_sort_rg_marked.bam	4	tbr	EARLY BLUE	North America	US	cultivated
5	AV_68	AV_68_S22_R1_001_cutadapt_bowtie2_sort_rg_marked.bam	4	tbr	PETER WILCOX	North America	US	cultivated
6	AV27	AV27_S28_R1_001_cutadapt_bowtie2_sort_rg_marked.bam	4	tbr	RED PONTIAC	North America	US	cultivated
7	PI595438	BAO_052_S66_R1_001_cutadapt_bowtie2_sort_rg_marked.bam	2	juz	AZUL LUK'I	South American	bolivia	landrace
8	PI642181	BAO_053_S72_R1_001_cutadapt_bowtie2_sort_rg_marked.bam	4	tbr adg	YURACC CCOMPIS	South American	peru	landrace
9	PI642446	BAO_067_S56_R1_001_cutadapt_bowtie2_sort_rg_marked.bam	4	tbr adg	OKELLA QUEHUILLO	South American	peru	landrace
10	PI246554	BAO_095_S83_R1_001_cutadapt_bowtie2_sort_rg_marked.bam	4	tbr adg	COR P.256	South American	peru	cultivated
11	PI245783	BAO_098_S13_R1_001_cutadapt_bowtie2_sort_rg_marked.bam	4	tbr adg	COR C.43	South American	peru	cultivated
12	PI245321	BAO_101_S31_R1_001_cutadapt_bowtie2_sort_rg_marked.bam	4	tbr adg	COR C.12	South American	chile	cultivated
13	PI292088	BAO_112_S3_R1_001_cutadapt_bowtie2_sort_rg_marked.bam	4	tbr adg	UGN 5381	South American	peru	cultivated
14	PI566801	BAO_116_S27_R1_001_cutadapt_bowtie2_sort_rg_marked.bam	4	tbr adg	HOF 1654	South American	Argentina	cultivated
15	PI205624	BAO_136_S6_R1_001_cutadapt_bowtie2_sort_rg_marked.bam	4	tbr adg	CPC 2201 (85)	South American	peru	cultivated
16	PI214426	BAO_141_S36_R1_001_cutadapt_bowtie2_sort_rg_marked.bam	4	tbr adg	SMI 453	South American	peru	cultivated
17	PI214441	BAO_146_S61_R1_001_cutadapt_bowtie2_sort_rg_marked.bam	4	tbr adg	SMI 503	South American	peru	cultivated
18	PI214443	BAO_148_S73_R1_001_cutadapt_bowtie2_sort_rg_marked.bam	4	tbr adg	SMI 505	South American	peru	cultivated
19	PI230457	BAO_161_S57_R1_001_cutadapt_bowtie2_sort_rg_marked.bam	4	tbr adg	CPC 1464	South American	peru	cultivated
20	PI230500	BAO_168_S52_R1_001_cutadapt_bowtie2_sort_rg_marked.bam	4	tbr adg	OCH 1245	South American	peru	cultivated
21	PI234004	BAO_176_S53_R1_001_cutadapt_bowtie2_sort_rg_marked.bam	4	tbr	GND 28	South American	bolivia	cultivated
22	PI243360	BAO_178_S65_R1_001_cutadapt_bowtie2_sort_rg_marked.bam	4	tbr adg	CCC 2	South American	colombia	cultivated
23	PI243366	BAO_179_S71_R1_001_cutadapt_bowtie2_sort_rg_marked.bam	4	tbr adg	CCC 27	South American	colombia	cultivated
24	PI243396	BAO_180_S77_R1_001_cutadapt_bowtie2_sort_rg_marked.bam	4	tbr adg	CCC 162	South American	colombia	cultivated
25	PI243399	BAO_181_S83_R1_001_cutadapt_bowtie2_sort_rg_marked.bam	4	tbr adg	CCC 194	South American	ecuador	cultivated
26	PI243400	BAO_182_S89_R1_001_cutadapt_bowtie2_sort_rg_marked.bam	4	tbr adg	CCC 196	South American	ecuador	cultivated
27	PI243401	BAO_183_S95_R1_001_cutadapt_bowtie2_sort_rg_marked.bam	4	tbr adg	CCC 198	South American	ecuador	cultivated
28	PI243410	BAO_192_S13_R1_001_cutadapt_bowtie2_sort_rg_marked.bam	4	tbr adg	CCC 214	South American	ecuador	cultivated
29	PI243415	BAO_194_S25_R1_001_cutadapt_bowtie2_sort_rg_marked.bam	4	tbr adg	CCC 249	South American	colombia	cultivated
30	PI243421	BAO_195_S31_R1_001_cutadapt_bowtie2_sort_rg_marked.bam	4	tbr adg	CCC 269	South American	colombia	cultivated
31	PI246514	BAO_204_S38_R1_001_cutadapt_bowtie2_sort_rg_marked.bam	4	tbr adg	COR P.202	South American	peru	cultivated
32	PI255494	BAO_214_S4_R1_001_cutadapt_bowtie2_sort_rg_marked.bam	4	tbr adg	CEEA 19	South American	bolivia	cultivated
33	PI255508	BAO_216_S16_R1_001_cutadapt_bowtie2_sort_rg_marked.bam	4	tbr adg	BRU 806	South American	bolivia	cultivated
34	PI265868	BAO_221_S46_R1_001_cutadapt_bowtie2_sort_rg_marked.bam	4	tbr adg	EBS 1816	South American	bolivia	cultivated
35	PI280886	BAO_222_S5_R1_001_cutadapt_bowtie2_sort_rg_marked.bam	4	tbr adg	WAC 156	South American	bolivia	cultivated
36	PI280942	BAO_223_S11_R1_001_cutadapt_bowtie2_sort_rg_marked.bam	4	tbr adg	WAC 1426	South American	bolivia	cultivated
37	PI280960	BAO_224_S17_R1_001_cutadapt_bowtie2_sort_rg_marked.bam	4	tbr adg	WAC 1468	South American	bolivia	cultivated
38	PI280988	BAO_226_S29_R1_001_cutadapt_bowtie2_sort_rg_marked.bam	4	tbr adg	WAC 710	South American	bolivia	cultivated
39	PI280998	BAO_228_S41_R1_001_cutadapt_bowtie2_sort_rg_marked.bam	4	tbr adg	WAC 741	South American	bolivia	cultivated
40	PI281012	BAO_231_S12_R1_001_cutadapt_bowtie2_sort_rg_marked.bam	4	tbr adg	WAC 775	South American	bolivia	cultivated
41	PI281038	BAO_234_S30_R1_001_cutadapt_bowtie2_sort_rg_marked.bam	4	tbr adg	WAC 5	South American	peru	cultivated
42	PI281041	BAO_235_S36_R1_001_cutadapt_bowtie2_sort_rg_marked.bam	4	tbr adg	WAC 8	South American	peru	cultivated
43	PI281046	BAO_236_S42_R1_001_cutadapt_bowtie2_sort_rg_marked.bam	4	tbr adg	WAC 168	South American	peru	cultivated
44	PI281062	BAO_240_S61_R1_001_cutadapt_bowtie2_sort_rg_marked.bam	4	tbr adg	WAC 210	South American	peru	cultivated
45	PI281064	BAO_242_S73_R1_001_cutadapt_bowtie2_sort_rg_marked.bam	4	tbr adg	WAC 215	South American	peru	cultivated
46	PI281071	BAO_246_S50_R1_001_cutadapt_bowtie2_sort_rg_marked.bam	4	tbr adg	WAC 242	South American	peru	cultivated
47	PI281076	BAO_250_S74_R1_001_cutadapt_bowtie2_sort_rg_marked.bam	4	tbr adg	WAC 248	South American	peru	cultivated
48	PI281101	BAO_262_S52_R1_001_cutadapt_bowtie2_sort_rg_marked.bam	4	tbr adg	WAC 313	South American	peru	cultivated
49	PI281107	BAO_264_S64_R1_001_cutadapt_bowtie2_sort_rg_marked.bam	4	tbr adg	WAC 336	South American	peru	cultivated
50	PI281111	BAO_265_S70_R1_001_cutadapt_bowtie2_sort_rg_marked.bam	4	tbr adg	WAC 350	South American	peru	cultivated
51	PI281119	BAO_267_S82_R1_001_cutadapt_bowtie2_sort_rg_marked.bam	4	tbr adg	WAC 370	South American	peru	cultivated
52	PI292078	BAO_274_S77_R1_001_cutadapt_bowtie2_sort_rg_marked.bam	4	tbr adg	UGN 5257	South American	peru	cultivated
53	PI292090	BAO_277_S95_R1_001_cutadapt_bowtie2_sort_rg_marked.bam	4	tbr adg	UGN 5383	South American	peru	cultivated
54	PI310949	BAO_281_S72_R1_001_cutadapt_bowtie2_sort_rg_marked.bam	4	tbr adg	UGN 3538	South American	peru	cultivated
55	PI365345	BAO_290_S37_R1_001_cutadapt_bowtie2_sort_rg_marked.bam	4	tbr adg	OCH S-100	South American	peru	cultivated
56	PI365372	BAO_292_S2_R1_001_cutadapt_bowtie2_sort_rg_marked.bam	4	tbr adg	OCH SC-96	South American	peru	cultivated
57	PI473247	BAO_296_S26_R1_001_cutadapt_bowtie2_sort_rg_marked.bam	4	tbr adg	OKA 3872	South American	argentina	cultivated
58	PI473251	BAO_298_S38_R1_001_cutadapt_bowtie2_sort_rg_marked.bam	4	tbr adg	OKA 3938	South American	argentina	cultivated
59	PI473259	BAO_300_S3_R1_001_cutadapt_bowtie2_sort_rg_marked.bam	4	tbr adg	HOF 2010	South American	argentina	cultivated
60	PI473284	BAO_306_S39_R1_001_cutadapt_bowtie2_sort_rg_marked.bam	4	tbr adg	OKA 5603	South American	argentina	cultivated
61	PI473286	BAO_307_S45_R1_001_cutadapt_bowtie2_sort_rg_marked.bam	4	tbr adg	OKA 5655	South American	argentina	cultivated
62	PI473393	BAO_312_S28_R1_001_cutadapt_bowtie2_sort_rg_marked.bam	4	tbr adg	HHCH 4598	South American	bolivia	cultivated
63	PI558144	BAO_323_S47_R1_001_cutadapt_bowtie2_sort_rg_marked.bam	4	tbr adg	OKA 7599	South American	argentina	cultivated
64	PI558145	BAO_324_S6_R1_001_cutadapt_bowtie2_sort_rg_marked.bam	4	tbr adg	OKA 7674	South American	argentina	cultivated
65	PI567848	BAO_327_S24_R1_001_cutadapt_bowtie2_sort_rg_marked.bam	4	tbr adg	SCLp 5061	South American	ecuador	cultivated
66	PI583339	BAO_337_S78_R1_001_cutadapt_bowtie2_sort_rg_marked.bam	4	tbr	CIP 391056	South American	peru	cultivated
67	PI583340	BAO_338_S83_R1_001_cutadapt_bowtie2_sort_rg_marked.bam	4	tbr	CIP 391057	South American	peru	cultivated
68	PI584496	BAO_344_S73_R1_001_cutadapt_bowtie2_sort_rg_marked.bam	4	tbr	CIP 391048	South American	peru	cultivated
69	PI590927	BAO_347_S90_R1_001_cutadapt_bowtie2_sort_rg_marked.bam	4	tbr	CIP 391007	South American	peru	cultivated
70	PI595449	BAO_349_S57_R1_001_cutadapt_bowtie2_sort_rg_marked.bam	4	tbr	CON 888	South American	chile	cultivated
71	PI595458	BAO_350_S63_R1_001_cutadapt_bowtie2_sort_rg_marked.bam	4	tbr	CON 925	South American	chile	cultivated
72	PI607886	BAO_352_S74_R1_001_cutadapt_bowtie2_sort_rg_marked.bam	4	tbr adg	SS 7223	South American	peru	cultivated
73	PI607497	BAO009_S49_R1_001_cutadapt_bowtie2_sort_rg_marked.bam	4	tbr adg	PAPA CHONCA	South American	chile	landrace
74	PI619141	BAO032_S93_R1_001_cutadapt_bowtie2_sort_rg_marked.bam	4	tbr adg	HUAGALINA	South American	peru	landrace
75	PI661982	BARBARA_S29_R1_001_cutadapt_bowtie2_sort_rg_marked.bam	4	tbr	BARBARA	europe	germany	cultivated
76	GS_23	GS_23_S3_R1_001_cutadapt_bowtie2_sort_rg_marked.bam	4	tbr	US-W 4519-MERRIMACK	North America	US	cultivated
77	KBLV_56-33	KBLV_56-33_S53_R1_001_cutadapt_bowtie2_sort_rg_marked.bam	2	blv	HHCH5058	South American	peru	wild
78	PI_199102	PI_199102_S24_R1_001_cutadapt_bowtie2_sort_rg_marked.bam	4	tbr	VICTOR	europe	spain	cultivated
79	PI_199285	PI_199285_S80_R1_001_cutadapt_bowtie2_sort_rg_marked.bam	4	tbr	FRUHPERLE	europe	germany	cultivated
80	PI_200115	PI_200115_S61_R1_001_cutadapt_bowtie2_sort_rg_marked.bam	4	tbr	BELLE DE FONTENAY	europe	france	cultivated
81	PI_201777	PI_201777_S73_R1_001_cutadapt_bowtie2_sort_rg_marked.bam	4	tbr	MARIUS	europe	Norway	cultivated
82	PI_223730	PI_223730_S67_R1_001_cutadapt_bowtie2_sort_rg_marked.bam	4	tbr	MARITTA	europe	germany	cultivated
83	PI_239567	PI_239567_S9_R1_001_cutadapt_bowtie2_sort_rg_marked.bam	4	tbr	SIEGLINDE	europe	Austria	cultivated
84	PI_285264	PI_285264_S12_R1_001_cutadapt_bowtie2_sort_rg_marked.bam	4	tbr	ADVIRA	europe	germany	cultivated
85	PI_518592	PI_518592_S7_R1_001_cutadapt_bowtie2_sort_rg_marked.bam	4	tbr	PAPA AMARGA	South American	uruguay	cultivated
86	PI_527977	PI_527977_S82_R1_001_cutadapt_bowtie2_sort_rg_marked.bam	4	tbr	LOW BAY	South American	chile	landrace
87	PI_587046	PI_587046_S24_R1_001_cutadapt_bowtie2_sort_rg_marked.bam	4	tbr	UKAMA	europe	netherlands	cultivated
88	PI_587051	PI_587051_S42_R1_001_cutadapt_bowtie2_sort_rg_marked.bam	4	tbr	CORINE	europe	netherlands	cultivated
89	PI_599259	PI_599259_S34_R1_001_cutadapt_bowtie2_sort_rg_marked.bam	2	juz	LUCKY	South American	bolivia	landrace
90	PI_607472	PI_607472_S28_R1_001_cutadapt_bowtie2_sort_rg_marked.bam	4	tbr adg	KHUCHI AKITA	South American	bolivia	landrace
91	PI_619158	PI_619158_S40_R1_001_cutadapt_bowtie2_sort_rg_marked.bam	4	tbr	V-3	South American	peru	cultivated
92	PI_642441	PI_642441_S2_R1_001_cutadapt_bowtie2_sort_rg_marked.bam	4	tbr adg	HUICHIRI	South American	peru	landrace
93	PI_661981	PI_661981_S47_R1_001_cutadapt_bowtie2_sort_rg_marked.bam	4	tbr	ASUN	europe	spain	cultivated
94	PI_662324	PI_662324_S3_R1_001_cutadapt_bowtie2_sort_rg_marked.bam	4	tbr adg	LLUNCHUYWAQACHI	South American	peru	landrace
95	PI_664475	PI_664475_S21_R1_001_cutadapt_bowtie2_sort_rg_marked.bam	4	tbr adg	CHIQUILLA PITIQUINA	South American	peru	landrace
96	PI_673450	PI_673450_S44_R1_001_cutadapt_bowtie2_sort_rg_marked.bam	4	tbr	ELMER'S BLUE	North American	canada	cultivated
97	PI245792	PI245792_S11_R1_001_cutadapt_bowtie2_sort_rg_marked.bam	4	tbr	MORADA OJUDA	South American	chile	cultivated
98	PI587067	PI587067_S47_R1_001_cutadapt_bowtie2_sort_rg_marked.bam	4	tbr	TOLLOCAN	South American	mexico	cultivated
99	PI595438	PI595438_S35_R1_001_cutadapt_bowtie2_sort_rg_marked.bam	2	juz	AZUL LUK'I.1	South American	bolivia	landrace
100	PI633601	PI633601_S12_R1_001_cutadapt_bowtie2_sort_rg_marked.bam	4	tbr	EDEN	europe	UK	cultivated

## Sheet: 100% coverage
selection number	GRIN_Id	plate_Id	Ploidy	species	CLONE	continent	region	status
1	AV_1	AV_1_S46_R1_001_cutadapt_bowtie2_sort_rg_marked.bam	4	tbr	ALASKA FROSTLESS	North America	US	cultivated
2	AV_10	AV_10_S80_R1_001_cutadapt_bowtie2_sort_rg_marked.bam	4	tbr	EARLY GEM	North America	US	cultivated
3	AV_11	AV_11_S5_R1_001_cutadapt_bowtie2_sort_rg_marked.bam	4	tbr	EARLY OHIO	North America	US	cultivated
4	AV_12	AV_12_S62_R1_001_cutadapt_bowtie2_sort_rg_marked.bam	4	tbr	EARLY ROSE	North America	US	cultivated
5	AV_20	AV_20_S1_R1_001_cutadapt_bowtie2_sort_rg_marked.bam	4	tbr	LEMHI RUSSET	North America	US	cultivated
6	AV_26	AV_26_S11_R1_001_cutadapt_bowtie2_sort_rg_marked.bam	4	tbr	OZETTE	North America	US	cultivated
7	AV_3	AV_3_S85_R1_001_cutadapt_bowtie2_sort_rg_marked.bam	4	tbr	BAKE-KING	North America	US	cultivated
8	AV_32	AV_32_S51_R1_001_cutadapt_bowtie2_sort_rg_marked.bam	4	tbr	SACO	North America	US	cultivated
9	AV_37	AV_37_S26_R1_001_cutadapt_bowtie2_sort_rg_marked.bam	4	tbr	TRIUMPH	North America	US	cultivated
10	AV_42	AV_42_S70_R1_001_cutadapt_bowtie2_sort_rg_marked.bam	4	tbr	EARLY BLUE	North America	US	cultivated
11	AV_50	AV_50_S23_R1_001_cutadapt_bowtie2_sort_rg_marked.bam	4	tbr	ALLEGANY	North America	US	cultivated
12	AV_57	AV_57_S43_R1_001_cutadapt_bowtie2_sort_rg_marked.bam	4	tbr	FRONTIER RUSSET	North America	US	cultivated
13	AV_58	AV_58_S25_R1_001_cutadapt_bowtie2_sort_rg_marked.bam	4	tbr	GEMCHIP	North America	US	cultivated
14	AV_60	AV_60_S7_R1_001_cutadapt_bowtie2_sort_rg_marked.bam	4	tbr	SANGRE	North America	US	cultivated
15	AV_61	AV_61_S59_R1_001_cutadapt_bowtie2_sort_rg_marked.bam	4	tbr	PUNGO	North America	US	cultivated
16	AV_64	AV_64_S59_R1_001_cutadapt_bowtie2_sort_rg_marked.bam	4	tbr	RUSSET NUGGET	North America	US	cultivated
17	AV_66	AV_66_S16_R1_001_cutadapt_bowtie2_sort_rg_marked.bam	4	tbr	AMEY	North America	US	cultivated
18	AV_67	AV_67_S5_R1_001_cutadapt_bowtie2_sort_rg_marked.bam	4	tbr	HARLEY BLACKWELL	North America	US	cultivated
19	AV_68	AV_68_S22_R1_001_cutadapt_bowtie2_sort_rg_marked.bam	4	tbr	PETER WILCOX	North America	US	cultivated
20	AV2	AV2_S34_R1_001_cutadapt_bowtie2_sort_rg_marked.bam	4	tbr	ATLANTIC	North America	US	cultivated
21	AV21	AV21_S16_R1_001_cutadapt_bowtie2_sort_rg_marked.bam	4	tbr	LENAPE	North America	US	cultivated
22	AV27	AV27_S28_R1_001_cutadapt_bowtie2_sort_rg_marked.bam	4	tbr	RED PONTIAC	North America	US	cultivated
23	AV48	AV48_S6_R1_001_cutadapt_bowtie2_sort_rg_marked.bam	4	tbr	MONONA	North America	US	cultivated
24	AV5	AV5_S22_R1_001_cutadapt_bowtie2_sort_rg_marked.bam	4	tbr	BISON	North America	US	cultivated
25	AV56	AV56_S29_R1_001_cutadapt_bowtie2_sort_rg_marked.bam	4	tbr	CHIPETA	North America	US	cultivated
26	AV9	AV9_S40_R1_001_cutadapt_bowtie2_sort_rg_marked.bam	4	tbr	DENALI	North America	US	cultivated
27	PI645563	BAO_051_S60_R1_001_cutadapt_bowtie2_sort_rg_marked.bam	4	tbr	CASA BLANCA	South American	peru	landrace
28	PI595438	BAO_052_S66_R1_001_cutadapt_bowtie2_sort_rg_marked.bam	2	juz	AZUL LUK'I	South American	bolivia	landrace
29	PI642181	BAO_053_S72_R1_001_cutadapt_bowtie2_sort_rg_marked.bam	4	tbr adg	YURACC CCOMPIS	South American	peru	landrace
30	PI642184	BAO_056_S89_R1_001_cutadapt_bowtie2_sort_rg_marked.bam	4	tbr adg	SUYTU VILQUINA	South American	peru	landrace
31	PI642186	BAO_058_S55_R1_001_cutadapt_bowtie2_sort_rg_marked.bam	4	tbr adg	YUGUIMA	South American	peru	landrace
32	PI642438	BAO_062_S73_R1_001_cutadapt_bowtie2_sort_rg_marked.bam	4	tbr adg	ALCCA IMILLA	South American	peru	landrace
33	PI642439	BAO_063_S79_R1_001_cutadapt_bowtie2_sort_rg_marked.bam	4	tbr adg	CANASTA	South American	peru	landrace
34	PI642440	BAO_064_S85_R1_001_cutadapt_bowtie2_sort_rg_marked.bam	4	tbr adg	GARHUASH SUITO	South American	peru	landrace
35	PI642441	BAO_065_S90_R1_001_cutadapt_bowtie2_sort_rg_marked.bam	4	tbr adg	HUICHIRI	South American	peru	landrace
36	PI642444	BAO_066_S50_R1_001_cutadapt_bowtie2_sort_rg_marked.bam	4	tbr adg	PUCA TROMBOS	South American	peru	landrace
37	PI642446	BAO_067_S56_R1_001_cutadapt_bowtie2_sort_rg_marked.bam	4	tbr adg	OKELLA QUEHUILLO	South American	peru	landrace
38	PI662324	BAO_069_S68_R1_001_cutadapt_bowtie2_sort_rg_marked.bam	4	tbr adg	LLUNCHUYWAQACHI	South American	peru	landrace
39	PI664474	BAO_071_S80_R1_001_cutadapt_bowtie2_sort_rg_marked.bam	4	tbr adg	YANAMATA	South American	peru	landrace
40	PI664475	BAO_072_S86_R1_001_cutadapt_bowtie2_sort_rg_marked.bam	4	tbr adg	CHIQUILLA PITIQUINA	South American	peru	landrace
41	PI664477	BAO_074_S51_R1_001_cutadapt_bowtie2_sort_rg_marked.bam	4	tbr adg	LEONA - OCH 7009	South American	ecuador	landrace
42	PI205524	BAO_085_S70_R1_001_cutadapt_bowtie2_sort_rg_marked.bam	4	tbr adg	CPC 2359X2355	South American	colombia	cultivated
43	PI230586	BAO_086_S76_R1_001_cutadapt_bowtie2_sort_rg_marked.bam	4	tbr adg	GND s.n.	South American	bolivia	cultivated
44	PI214421	BAO_088_S88_R1_001_cutadapt_bowtie2_sort_rg_marked.bam	4	tbr adg	SMI 448	South American	peru	cultivated
45	PI214437	BAO_089_S93_R1_001_cutadapt_bowtie2_sort_rg_marked.bam	4	tbr adg	SMI 499	South American	peru	cultivated
46	PI258867	BAO_091_S59_R1_001_cutadapt_bowtie2_sort_rg_marked.bam	4	tbr adg	CAR 21	South American	bolivia	cultivated
47	PI258891	BAO_092_S65_R1_001_cutadapt_bowtie2_sort_rg_marked.bam	4	tbr adg	CAR 305	South American	bolivia	cultivated
48	PI258934	BAO_094_S77_R1_001_cutadapt_bowtie2_sort_rg_marked.bam	4	tbr adg	CAR 113	South American	bolivia	cultivated
49	PI246554	BAO_095_S83_R1_001_cutadapt_bowtie2_sort_rg_marked.bam	4	tbr adg	COR P.256	South American	peru	cultivated
50	PI214435	BAO_096_S1_R1_001_cutadapt_bowtie2_sort_rg_marked.bam	4	tbr adg	SMI 465	South American	peru	cultivated
51	PI245783	BAO_098_S13_R1_001_cutadapt_bowtie2_sort_rg_marked.bam	4	tbr adg	COR C.43	South American	peru	cultivated
52	PI245321	BAO_101_S31_R1_001_cutadapt_bowtie2_sort_rg_marked.bam	4	tbr adg	COR C.12	South American	chile	cultivated
53	PI245845	BAO_102_S37_R1_001_cutadapt_bowtie2_sort_rg_marked.bam	4	tbr	COR C.105	South American	chile	cultivated
54	PI245795	BAO_103_S43_R1_001_cutadapt_bowtie2_sort_rg_marked.bam	4	tbr	COR C.55	South American	chile	cultivated
55	PI292074	BAO_105_S8_R1_001_cutadapt_bowtie2_sort_rg_marked.bam	4	tbr adg	UGN 5243	South American	peru	cultivated
56	PI292075	BAO_106_S14_R1_001_cutadapt_bowtie2_sort_rg_marked.bam	4	tbr adg	UGN 5244	South American	peru	cultivated
57	PI292084	BAO_109_S32_R1_001_cutadapt_bowtie2_sort_rg_marked.bam	4	tbr adg	UGN 5307	South American	peru	cultivated
58	PI292088	BAO_112_S3_R1_001_cutadapt_bowtie2_sort_rg_marked.bam	4	tbr adg	UGN 5381	South American	peru	cultivated
59	PI566801	BAO_116_S27_R1_001_cutadapt_bowtie2_sort_rg_marked.bam	4	tbr adg	HOF 1654	South American	Argentina	cultivated
60	PI281049	BAO_118_S39_R1_001_cutadapt_bowtie2_sort_rg_marked.bam	4	tbr adg	WAC 173	South American	peru	cultivated
61	PI186178	BAO_121_S10_R1_001_cutadapt_bowtie2_sort_rg_marked.bam	4	tbr adg	OCH s.n.	South American	peru	cultivated
62	PI186180	BAO_123_S22_R1_001_cutadapt_bowtie2_sort_rg_marked.bam	4	tbr adg	OCH s.n.	South American	peru	cultivated
63	PI195162	BAO_124_S28_R1_001_cutadapt_bowtie2_sort_rg_marked.bam	4	tbr adg	CPC 300	South American	peru	cultivated
64	PI205622	BAO_134_S41_R1_001_cutadapt_bowtie2_sort_rg_marked.bam	4	tbr adg	CPC 2201 (30)	South American	colombia	cultivated
65	PI205623	BAO_135_S47_R1_001_cutadapt_bowtie2_sort_rg_marked.bam	4	tbr adg	CPC 1673 X 2201	South American	bolivia	cultivated
66	PI205624	BAO_136_S6_R1_001_cutadapt_bowtie2_sort_rg_marked.bam	4	tbr adg	CPC 2201 (85)	South American	peru	cultivated
67	PI214426	BAO_141_S36_R1_001_cutadapt_bowtie2_sort_rg_marked.bam	4	tbr adg	SMI 453	South American	peru	cultivated
68	PI214434	BAO_144_S49_R1_001_cutadapt_bowtie2_sort_rg_marked.bam	4	tbr adg	SMI 464	South American	peru	cultivated
69	PI214436	BAO_145_S55_R1_001_cutadapt_bowtie2_sort_rg_marked.bam	4	tbr adg	SMI 466	South American	peru	cultivated
70	PI214441	BAO_146_S61_R1_001_cutadapt_bowtie2_sort_rg_marked.bam	4	tbr adg	SMI 503	South American	peru	cultivated
71	PI214442	BAO_147_S67_R1_001_cutadapt_bowtie2_sort_rg_marked.bam	4	tbr adg	SMI 504	South American	peru	cultivated
72	PI214443	BAO_148_S73_R1_001_cutadapt_bowtie2_sort_rg_marked.bam	4	tbr adg	SMI 505	South American	peru	cultivated
73	PI225635	BAO_149_S79_R1_001_cutadapt_bowtie2_sort_rg_marked.bam	4	tbr adg	CCC 427	South American	venezuela	cultivated
74	PI225669	BAO_150_S85_R1_001_cutadapt_bowtie2_sort_rg_marked.bam	2	phu	CCC 118	South American	colombia	cultivated
75	PI230457	BAO_161_S57_R1_001_cutadapt_bowtie2_sort_rg_marked.bam	4	tbr adg	CPC 1464	South American	peru	cultivated
76	PI230470	BAO_162_S63_R1_001_cutadapt_bowtie2_sort_rg_marked.bam	4	tbr adg	IICA 3319	South American	ecuador	cultivated
77	PI230471	BAO_163_S69_R1_001_cutadapt_bowtie2_sort_rg_marked.bam	4	tbr adg	IICA 3320	South American	ecuador	cultivated
78	PI230499	BAO_167_S93_R1_001_cutadapt_bowtie2_sort_rg_marked.bam	4	tbr adg	OCH 1226	South American	peru	cultivated
79	PI230500	BAO_168_S52_R1_001_cutadapt_bowtie2_sort_rg_marked.bam	4	tbr adg	OCH 1245	South American	peru	cultivated
80	PI232841	BAO_174_S88_R1_001_cutadapt_bowtie2_sort_rg_marked.bam	4	tbr adg	EELM s.n.	South American	peru	cultivated
81	PI232842	BAO_175_S94_R1_001_cutadapt_bowtie2_sort_rg_marked.bam	4	tbr adg	EELM s.n.	South American	peru	cultivated
82	PI234004	BAO_176_S53_R1_001_cutadapt_bowtie2_sort_rg_marked.bam	4	tbr	GND 28	South American	bolivia	cultivated
83	PI237208	BAO_177_S59_R1_001_cutadapt_bowtie2_sort_rg_marked.bam	4	tbr adg	DIA 5	South American	ecudor	cultivated
84	PI243360	BAO_178_S65_R1_001_cutadapt_bowtie2_sort_rg_marked.bam	4	tbr adg	CCC 2	South American	colombia	cultivated
85	PI243366	BAO_179_S71_R1_001_cutadapt_bowtie2_sort_rg_marked.bam	4	tbr adg	CCC 27	South American	colombia	cultivated
86	PI243396	BAO_180_S77_R1_001_cutadapt_bowtie2_sort_rg_marked.bam	4	tbr adg	CCC 162	South American	colombia	cultivated
87	PI243399	BAO_181_S83_R1_001_cutadapt_bowtie2_sort_rg_marked.bam	4	tbr adg	CCC 194	South American	ecuador	cultivated
88	PI243400	BAO_182_S89_R1_001_cutadapt_bowtie2_sort_rg_marked.bam	4	tbr adg	CCC 196	South American	ecuador	cultivated
89	PI243401	BAO_183_S95_R1_001_cutadapt_bowtie2_sort_rg_marked.bam	4	tbr adg	CCC 198	South American	ecuador	cultivated
90	PI243402	BAO_184_S54_R1_001_cutadapt_bowtie2_sort_rg_marked.bam	4	tbr adg	CCC 199	South American	ecuador	cultivated
91	PI243403	BAO_185_S60_R1_001_cutadapt_bowtie2_sort_rg_marked.bam	4	tbr adg	CCC 201	South American	ecuador	cultivated
92	PI243407	BAO_189_S84_R1_001_cutadapt_bowtie2_sort_rg_marked.bam	4	tbr adg	CCC 208	South American	ecuador	cultivated
93	PI243409	BAO_191_S7_R1_001_cutadapt_bowtie2_sort_rg_marked.bam	4	tbr adg	CCC 210	South American	ecuador	cultivated
94	PI243410	BAO_192_S13_R1_001_cutadapt_bowtie2_sort_rg_marked.bam	4	tbr adg	CCC 214	South American	ecuador	cultivated
95	PI243415	BAO_194_S25_R1_001_cutadapt_bowtie2_sort_rg_marked.bam	4	tbr adg	CCC 249	South American	colombia	cultivated
96	PI243421	BAO_195_S31_R1_001_cutadapt_bowtie2_sort_rg_marked.bam	4	tbr adg	CCC 269	South American	colombia	cultivated
97	PI243438	BAO_197_S43_R1_001_cutadapt_bowtie2_sort_rg_marked.bam	4	tbr adg	CCC 425	South American	venezuela	cultivated
98	PI245320	BAO_200_S14_R1_001_cutadapt_bowtie2_sort_rg_marked.bam	4	tbr adg	COR C.11	South American	chile	cultivated
99	PI246497	BAO_202_S26_R1_001_cutadapt_bowtie2_sort_rg_marked.bam	4	tbr adg	COR P.164	South American	peru	cultivated
100	PI246514	BAO_204_S38_R1_001_cutadapt_bowtie2_sort_rg_marked.bam	4	tbr adg	COR P.202	South American	peru	cultivated
101	PI246518	BAO_206_S3_R1_001_cutadapt_bowtie2_sort_rg_marked.bam	4	tbr adg	COR P.205B	South American	peru	cultivated
102	PI246521	BAO_207_S9_R1_001_cutadapt_bowtie2_sort_rg_marked.bam	4	tbr adg	COR P.207	South American	peru	cultivated
103	PI246540	BAO_208_S15_R1_001_cutadapt_bowtie2_sort_rg_marked.bam	4	tbr adg	COR P.242	South American	peru	cultivated
104	PI246541	BAO_209_S21_R1_001_cutadapt_bowtie2_sort_rg_marked.bam	4	tbr adg	COR P.243	South American	peru	cultivated
105	PI246555	BAO_212_S39_R1_001_cutadapt_bowtie2_sort_rg_marked.bam	4	tbr adg	COR P.257	South American	peru	cultivated
106	PI246979	BAO_213_S45_R1_001_cutadapt_bowtie2_sort_rg_marked.bam	4	tbr adg	COR E.448	South American	peru	cultivated
107	PI255494	BAO_214_S4_R1_001_cutadapt_bowtie2_sort_rg_marked.bam	4	tbr adg	CEEA 19	South American	bolivia	cultivated
108	PI255503	BAO_215_S10_R1_001_cutadapt_bowtie2_sort_rg_marked.bam	4	tbr adg	BRU 741	South American	argentina	cultivated
109	PI255508	BAO_216_S16_R1_001_cutadapt_bowtie2_sort_rg_marked.bam	4	tbr adg	BRU 806	South American	bolivia	cultivated
110	PI258917	BAO_219_S34_R1_001_cutadapt_bowtie2_sort_rg_marked.bam	4	tbr adg	CAR 350	South American	bolivia	cultivated
111	PI265868	BAO_221_S46_R1_001_cutadapt_bowtie2_sort_rg_marked.bam	4	tbr adg	EBS 1816	South American	bolivia	cultivated
112	PI280886	BAO_222_S5_R1_001_cutadapt_bowtie2_sort_rg_marked.bam	4	tbr adg	WAC 156	South American	bolivia	cultivated
113	PI280942	BAO_223_S11_R1_001_cutadapt_bowtie2_sort_rg_marked.bam	4	tbr adg	WAC 1426	South American	bolivia	cultivated
114	PI280960	BAO_224_S17_R1_001_cutadapt_bowtie2_sort_rg_marked.bam	4	tbr adg	WAC 1468	South American	bolivia	cultivated
115	PI280969	BAO_225_S23_R1_001_cutadapt_bowtie2_sort_rg_marked.bam	4	tbr adg	WAC 1495	South American	peru	cultivated
116	PI280988	BAO_226_S29_R1_001_cutadapt_bowtie2_sort_rg_marked.bam	4	tbr adg	WAC 710	South American	bolivia	cultivated
117	PI280990	BAO_227_S35_R1_001_cutadapt_bowtie2_sort_rg_marked.bam	4	tbr adg	WAC 719	South American	bolivia	cultivated
118	PI280998	BAO_228_S41_R1_001_cutadapt_bowtie2_sort_rg_marked.bam	4	tbr adg	WAC 741	South American	bolivia	cultivated
119	PI281009	BAO_230_S6_R1_001_cutadapt_bowtie2_sort_rg_marked.bam	4	tbr adg	WAC 770	South American	bolivia	cultivated
120	PI281012	BAO_231_S12_R1_001_cutadapt_bowtie2_sort_rg_marked.bam	4	tbr adg	WAC 775	South American	bolivia	cultivated
121	PI281023	BAO_233_S24_R1_001_cutadapt_bowtie2_sort_rg_marked.bam	4	tbr adg	WAC 849	South American	bolivia	cultivated
122	PI281038	BAO_234_S30_R1_001_cutadapt_bowtie2_sort_rg_marked.bam	4	tbr adg	WAC 5	South American	peru	cultivated
123	PI281041	BAO_235_S36_R1_001_cutadapt_bowtie2_sort_rg_marked.bam	4	tbr adg	WAC 8	South American	peru	cultivated
124	PI281046	BAO_236_S42_R1_001_cutadapt_bowtie2_sort_rg_marked.bam	4	tbr adg	WAC 168	South American	peru	cultivated
125	PI281059	BAO_237_S48_R1_001_cutadapt_bowtie2_sort_rg_marked.bam	4	tbr adg	WAC 198	South American	peru	cultivated
126	PI281062	BAO_240_S61_R1_001_cutadapt_bowtie2_sort_rg_marked.bam	4	tbr adg	WAC 210	South American	peru	cultivated
127	PI281064	BAO_242_S73_R1_001_cutadapt_bowtie2_sort_rg_marked.bam	4	tbr adg	WAC 215	South American	peru	cultivated
128	PI281065	BAO_243_S79_R1_001_cutadapt_bowtie2_sort_rg_marked.bam	4	tbr adg	WAC 216	South American	peru	cultivated
129	PI281066	BAO_244_S85_R1_001_cutadapt_bowtie2_sort_rg_marked.bam	4	tbr adg	WAC 217	South American	peru	cultivated
130	PI281070	BAO_245_S91_R1_001_cutadapt_bowtie2_sort_rg_marked.bam	4	tbr adg	WAC 240	South American	peru	cultivated
131	PI281071	BAO_246_S50_R1_001_cutadapt_bowtie2_sort_rg_marked.bam	4	tbr adg	WAC 242	South American	peru	cultivated
132	PI281073	BAO_247_S56_R1_001_cutadapt_bowtie2_sort_rg_marked.bam	4	tbr adg	WAC 245	South American	peru	cultivated
133	PI281074	BAO_248_S62_R1_001_cutadapt_bowtie2_sort_rg_marked.bam	4	tbr adg	WAC 246	South American	peru	cultivated
134	PI281076	BAO_250_S74_R1_001_cutadapt_bowtie2_sort_rg_marked.bam	4	tbr adg	WAC 248	South American	peru	cultivated
135	PI281078	BAO_251_S80_R1_001_cutadapt_bowtie2_sort_rg_marked.bam	4	tbr adg	WAC 254	South American	peru	cultivated
136	PI281079	BAO_252_S86_R1_001_cutadapt_bowtie2_sort_rg_marked.bam	4	tbr adg	WAC 256	South American	peru	cultivated
137	PI281092	BAO_258_S75_R1_001_cutadapt_bowtie2_sort_rg_marked.bam	4	tbr adg	WAC 282	South American	peru	cultivated
138	PI281093	BAO_259_S81_R1_001_cutadapt_bowtie2_sort_rg_marked.bam	4	tbr adg	WAC 286	South American	peru	cultivated
139	PI281101	BAO_262_S52_R1_001_cutadapt_bowtie2_sort_rg_marked.bam	4	tbr adg	WAC 313	South American	peru	cultivated
140	PI281107	BAO_264_S64_R1_001_cutadapt_bowtie2_sort_rg_marked.bam	4	tbr adg	WAC 336	South American	peru	cultivated
141	PI281111	BAO_265_S70_R1_001_cutadapt_bowtie2_sort_rg_marked.bam	4	tbr adg	WAC 350	South American	peru	cultivated
142	PI281119	BAO_267_S82_R1_001_cutadapt_bowtie2_sort_rg_marked.bam	4	tbr adg	WAC 370	South American	peru	cultivated
143	PI281198	BAO_269_S94_R1_001_cutadapt_bowtie2_sort_rg_marked.bam	4	tbr adg	WAC 607	South American	peru	cultivated
144	PI281227	BAO_270_S53_R1_001_cutadapt_bowtie2_sort_rg_marked.bam	4	tbr adg	WAC 688	South American	peru	cultivated
145	PI281258	BAO_271_S59_R1_001_cutadapt_bowtie2_sort_rg_marked.bam	4	tbr adg	WAC 915	South American	peru	cultivated
146	PI283123	BAO_272_S65_R1_001_cutadapt_bowtie2_sort_rg_marked.bam	2	phu	OCH 1475	South American	ecuador	cultivated
147	PI292078	BAO_274_S77_R1_001_cutadapt_bowtie2_sort_rg_marked.bam	4	tbr adg	UGN 5257	South American	peru	cultivated
148	PI292089	BAO_276_S89_R1_001_cutadapt_bowtie2_sort_rg_marked.bam	4	tbr adg	UGN 5382	South American	peru	cultivated
149	PI292090	BAO_277_S95_R1_001_cutadapt_bowtie2_sort_rg_marked.bam	4	tbr adg	UGN 5383	South American	peru	cultivated
150	PI292096	BAO_278_S54_R1_001_cutadapt_bowtie2_sort_rg_marked.bam	4	tbr adg	UGN 5488	South American	peru	cultivated
151	PI292097	BAO_279_S60_R1_001_cutadapt_bowtie2_sort_rg_marked.bam	4	tbr adg	UGN 5489	South American	peru	cultivated
152	PI292107	BAO_280_S66_R1_001_cutadapt_bowtie2_sort_rg_marked.bam	4	tbr adg	UGN 5540	South American	peru	cultivated
153	PI310949	BAO_281_S72_R1_001_cutadapt_bowtie2_sort_rg_marked.bam	4	tbr adg	UGN 3538	South American	peru	cultivated
154	PI320326	BAO_282_S90_R1_001_cutadapt_bowtie2_sort_rg_marked.bam	4	tbr adg	HHR 4051	South American	argentina	cultivated
155	PI320358	BAO_286_S94_R1_001_cutadapt_bowtie2_sort_rg_marked.bam	2	phu	CCC 1229	South American	colombia	cultivated
156	PI365345	BAO_290_S37_R1_001_cutadapt_bowtie2_sort_rg_marked.bam	4	tbr adg	OCH S-100	South American	peru	cultivated
157	PI365346	BAO_291_S43_R1_001_cutadapt_bowtie2_sort_rg_marked.bam	4	tbr adg	OCH S-103	South American	peru	cultivated
158	PI365372	BAO_292_S2_R1_001_cutadapt_bowtie2_sort_rg_marked.bam	4	tbr adg	OCH SC-96	South American	peru	cultivated
159	PI473247	BAO_296_S26_R1_001_cutadapt_bowtie2_sort_rg_marked.bam	4	tbr adg	OKA 3872	South American	argentina	cultivated
160	PI473249	BAO_297_S32_R1_001_cutadapt_bowtie2_sort_rg_marked.bam	4	tbr adg	OKA 3888	South American	argentina	cultivated
161	PI473251	BAO_298_S38_R1_001_cutadapt_bowtie2_sort_rg_marked.bam	4	tbr adg	OKA 3938	South American	argentina	cultivated
162	PI473255	BAO_299_S44_R1_001_cutadapt_bowtie2_sort_rg_marked.bam	4	tbr adg	OKA 3997	South American	argentina	cultivated
163	PI473259	BAO_300_S3_R1_001_cutadapt_bowtie2_sort_rg_marked.bam	4	tbr adg	HOF 2010	South American	argentina	cultivated
164	PI473265	BAO_301_S9_R1_001_cutadapt_bowtie2_sort_rg_marked.bam	4	tbr adg	OKA 4296	South American	argentina	cultivated
165	PI473270	BAO_303_S21_R1_001_cutadapt_bowtie2_sort_rg_marked.bam	4	tbr adg	OKA 4890	South American	argentina	cultivated
166	PI473272	BAO_304_S27_R1_001_cutadapt_bowtie2_sort_rg_marked.bam	4	tbr adg	OKA 5415	South American	argentina	cultivated
167	PI473281	BAO_305_S33_R1_001_cutadapt_bowtie2_sort_rg_marked.bam	4	tbr adg	OKA 5552	South American	argentina	cultivated
168	PI473284	BAO_306_S39_R1_001_cutadapt_bowtie2_sort_rg_marked.bam	4	tbr adg	OKA 5603	South American	argentina	cultivated
169	PI473286	BAO_307_S45_R1_001_cutadapt_bowtie2_sort_rg_marked.bam	4	tbr adg	OKA 5655	South American	argentina	cultivated
170	PI473393	BAO_312_S28_R1_001_cutadapt_bowtie2_sort_rg_marked.bam	4	tbr adg	HHCH 4598	South American	bolivia	cultivated
171	PI473508	BAO_314_S40_R1_001_cutadapt_bowtie2_sort_rg_marked.bam	4	tbr adg	AST 42	South American	bolivia	cultivated
172	PI500058	BAO_318_S17_R1_001_cutadapt_bowtie2_sort_rg_marked.bam	4	tbr adg	OKA 7572	South American	argentina	cultivated
173	PI546025	BAO_320_S29_R1_001_cutadapt_bowtie2_sort_rg_marked.bam	4	tbr adg	HOHL 259	South American	bolivia	cultivated
174	PI558138	BAO_321_S35_R1_001_cutadapt_bowtie2_sort_rg_marked.bam	4	tbr adg	OKA 7559	South American	argentina	cultivated
175	PI558144	BAO_323_S47_R1_001_cutadapt_bowtie2_sort_rg_marked.bam	4	tbr adg	OKA 7599	South American	argentina	cultivated
176	PI558145	BAO_324_S6_R1_001_cutadapt_bowtie2_sort_rg_marked.bam	4	tbr adg	OKA 7674	South American	argentina	cultivated
177	PI566802	BAO_325_S12_R1_001_cutadapt_bowtie2_sort_rg_marked.bam	4	tbr adg	KUL s.n.	South American	argentina	cultivated
178	PI566803	BAO_326_S18_R1_001_cutadapt_bowtie2_sort_rg_marked.bam	4	tbr adg	OKA 4312	South American	argentina	cultivated
179	PI567848	BAO_327_S24_R1_001_cutadapt_bowtie2_sort_rg_marked.bam	4	tbr adg	SCLp 5061	South American	ecuador	cultivated
180	PI583329	BAO_328_S30_R1_001_cutadapt_bowtie2_sort_rg_marked.bam	4	tbr	CIP 391003	South American	peru	cultivated
181	PI583331	BAO_329_S36_R1_001_cutadapt_bowtie2_sort_rg_marked.bam	4	tbr	CIP 391013	South American	peru	cultivated
182	PI583333	BAO_331_S48_R1_001_cutadapt_bowtie2_sort_rg_marked.bam	4	tbr	CIP 391019	South American	peru	cultivated
183	PI583334	BAO_332_S49_R1_001_cutadapt_bowtie2_sort_rg_marked.bam	4	tbr	CIP 391021	South American	peru	cultivated
184	PI583335	BAO_333_S55_R1_001_cutadapt_bowtie2_sort_rg_marked.bam	4	tbr	CIP 391044	South American	peru	cultivated
185	PI583339	BAO_337_S78_R1_001_cutadapt_bowtie2_sort_rg_marked.bam	4	tbr	CIP 391056	South American	peru	cultivated
186	PI583340	BAO_338_S83_R1_001_cutadapt_bowtie2_sort_rg_marked.bam	4	tbr	CIP 391057	South American	peru	cultivated
187	PI584493	BAO_341_S56_R1_001_cutadapt_bowtie2_sort_rg_marked.bam	4	tbr	CIP 391004	South American	peru	cultivated
188	PI584496	BAO_344_S73_R1_001_cutadapt_bowtie2_sort_rg_marked.bam	4	tbr	CIP 391048	South American	peru	cultivated
189	PI587110	BAO_345_S79_R1_001_cutadapt_bowtie2_sort_rg_marked.bam	4	tbr	CPS 4543	South American	chile	wild
190	PI587115	BAO_346_S84_R1_001_cutadapt_bowtie2_sort_rg_marked.bam	4	tbr adg	SVRPV 6327	South American	venezuela	cultivated
191	PI590927	BAO_347_S90_R1_001_cutadapt_bowtie2_sort_rg_marked.bam	4	tbr	CIP 391007	South American	peru	cultivated
192	PI595449	BAO_349_S57_R1_001_cutadapt_bowtie2_sort_rg_marked.bam	4	tbr	CON 888	South American	chile	cultivated
193	PI595458	BAO_350_S63_R1_001_cutadapt_bowtie2_sort_rg_marked.bam	4	tbr	CON 925	South American	chile	cultivated
194	PI607886	BAO_352_S74_R1_001_cutadapt_bowtie2_sort_rg_marked.bam	4	tbr adg	SS 7223	South American	peru	cultivated
195	PI607497	BAO009_S49_R1_001_cutadapt_bowtie2_sort_rg_marked.bam	4	tbr adg	PAPA CHONCA	South American	chile	landrace
196	PI607472	BAO013_S73_R1_001_cutadapt_bowtie2_sort_rg_marked.bam	4	tbr adg	KHUCHI AKITA	South American	bolivia	landrace
197	PI619136	BAO024_S92_R1_001_cutadapt_bowtie2_sort_rg_marked.bam	4	tbr	CRUZA 148	North America	mexico	cultivated
198	PI595444	BAO031_S87_R1_001_cutadapt_bowtie2_sort_rg_marked.bam	4	tbr adg	QOYLLU	South American	bolivia	landrace
199	PI619142	BAO035_S64_R1_001_cutadapt_bowtie2_sort_rg_marked.bam	4	tbr adg	BADULAQUE	South American	peru	landrace
200	PI245800	BAO038_S82_R1_001_cutadapt_bowtie2_sort_rg_marked.bam	4	tbr	MUCANA - COR C.60	South American	chile	landrace
201	PI660359	BAO039_S88_R1_001_cutadapt_bowtie2_sort_rg_marked.bam	4	tbr adg	NEGRA OJOSA	South American	argentina	landrace
202	PI660357	BAO046_S83_R1_001_cutadapt_bowtie2_sort_rg_marked.bam	4	tbr adg	SULLU	South American	peru	landrace
203	PI619158	BAO048_S95_R1_001_cutadapt_bowtie2_sort_rg_marked.bam	4	tbr	V-3	South American	peru	cultivated
204	PI661982	BARBARA_S29_R1_001_cutadapt_bowtie2_sort_rg_marked.bam	4	tbr	BARBARA	europe	germany	cultivated
205	GS_23	GS_23_S3_R1_001_cutadapt_bowtie2_sort_rg_marked.bam	4	tbr	US-W 4519-MERRIMACK	North America	US	cultivated
206	KBLV_56-25	KBLV_56-25_S52_R1_001_cutadapt_bowtie2_sort_rg_marked.bam	2	blv	HHCH5058	South American	peru	wild
207	KBLV_56-27	KBLV_56-27_S64_R1_001_cutadapt_bowtie2_sort_rg_marked.bam	2	blv	HHCH5058	South American	peru	wild
208	KBLV_56-36	KBLV_56-36_S59_R1_001_cutadapt_bowtie2_sort_rg_marked.bam	2	blv	HHCH5058	South American	peru	wild
209	KBLV_56-43	KBLV_56-43_S54_R1_001_cutadapt_bowtie2_sort_rg_marked.bam	2	blv	HHCH5058	South American	peru	wild
210	KBLV_56-44	KBLV_56-44_S60_R1_001_cutadapt_bowtie2_sort_rg_marked.bam	2	blv	HHCH5058	South American	peru	wild
211	PI_131750	PI_131750_S54_R1_001_cutadapt_bowtie2_sort_rg_marked.bam	4	tbr	OSTBOTE	europe	germany	cultivated
212	PI_182550	PI_182550_S19_R1_001_cutadapt_bowtie2_sort_rg_marked.bam	4	tbr	ACKERSEGEN	europe	germany	cultivated
213	PI_199102	PI_199102_S24_R1_001_cutadapt_bowtie2_sort_rg_marked.bam	4	tbr	VICTOR	europe	spain	cultivated
214	PI_199285	PI_199285_S80_R1_001_cutadapt_bowtie2_sort_rg_marked.bam	4	tbr	FRUHPERLE	europe	germany	cultivated
215	PI_200115	PI_200115_S61_R1_001_cutadapt_bowtie2_sort_rg_marked.bam	4	tbr	BELLE DE FONTENAY	europe	france	cultivated
216	PI_201777	PI_201777_S73_R1_001_cutadapt_bowtie2_sort_rg_marked.bam	4	tbr	MARIUS	europe	Norway	cultivated
217	PI_217560	PI_217560_S66_R1_001_cutadapt_bowtie2_sort_rg_marked.bam	4	tbr	URGENTA	europe	Netherlands	cultivated
218	PI_223726	PI_223726_S55_R1_001_cutadapt_bowtie2_sort_rg_marked.bam	4	tbr	BEVELANDER	europe	Natherlands	cultivated
219	PI_223730	PI_223730_S67_R1_001_cutadapt_bowtie2_sort_rg_marked.bam	4	tbr	MARITTA	europe	germany	cultivated
220	PI_237741	PI_237741_S76_R1_001_cutadapt_bowtie2_sort_rg_marked.bam	4	tbr	ELLA	europe	germany	cultivated
221	PI_239413	PI_239413_S34_R1_001_cutadapt_bowtie2_sort_rg_marked.bam	4	tbr	DORITA	South American	mexico	cultivated
222	PI_239567	PI_239567_S9_R1_001_cutadapt_bowtie2_sort_rg_marked.bam	4	tbr	SIEGLINDE	europe	Austria	cultivated
223	PI_270542	PI_270542_S30_R1_001_cutadapt_bowtie2_sort_rg_marked.bam	4	tbr	SUSANNA	europe	germany	cultivated
224	PI_285264	PI_285264_S12_R1_001_cutadapt_bowtie2_sort_rg_marked.bam	4	tbr	ADVIRA	europe	germany	cultivated
225	PI_319198	PI_319198_S77_R1_001_cutadapt_bowtie2_sort_rg_marked.bam	4	tbr	MIRKA	europe	czech republic	cultivated
226	PI_319425	PI_319425_S12_R1_001_cutadapt_bowtie2_sort_rg_marked.bam	4	tbr	ATZIMBA	South American	mexico	cultivated
227	PI_319426	PI_319426_S48_R1_001_cutadapt_bowtie2_sort_rg_marked.bam	4	tbr	BERTITA	South American	mexico	cultivated
228	PI_321622	PI_321622_S24_R1_001_cutadapt_bowtie2_sort_rg_marked.bam	4	tbr	FINA	europe	germany	cultivated
229	PI_349761	PI_349761_S84_R1_001_cutadapt_bowtie2_sort_rg_marked.bam	4	tbr	ISKRA	europe	Russia	cultivated
230	PI_362729	PI_362729_S35_R1_001_cutadapt_bowtie2_sort_rg_marked.bam	4	tbr	KANDIDAT	europe	russia	cultivated
231	PI_362742	PI_362742_S52_R1_001_cutadapt_bowtie2_sort_rg_marked.bam	4	tbr	TEMP	europe	russia	cultivated
232	PI_362744	PI_362744_S35_R1_001_cutadapt_bowtie2_sort_rg_marked.bam	4	tbr	VARMAS	europe	russia	cultivated
233	PI_372878	PI_372878_S36_R1_001_cutadapt_bowtie2_sort_rg_marked.bam	4	tbr	TALOVSKY 110	europe	russia	cultivated
234	PI_379596	PI_379596_S11_R1_001_cutadapt_bowtie2_sort_rg_marked.bam	4	tbr	CARIVINCA	europe	russia	cultivated
235	PI_379605	PI_379605_S58_R1_001_cutadapt_bowtie2_sort_rg_marked.bam	4	tbr	STOLOVIJ 19	europe	russia	cultivated
236	PI_407412	PI_407412_S86_R1_001_cutadapt_bowtie2_sort_rg_marked.bam	4	tbr	VORAN	europe	germany	cultivated
237	PI_407416	PI_407416_S4_R1_001_cutadapt_bowtie2_sort_rg_marked.bam	4	tbr	ARRAN PILOT	europe	UK	cultivated
238	PI_407420	PI_407420_S94_R1_001_cutadapt_bowtie2_sort_rg_marked.bam	4	tbr	KING EDWARD	europe	UK	cultivated
239	PI_407421	PI_407421_S32_R1_001_cutadapt_bowtie2_sort_rg_marked.bam	4	tbr	MAJESTIC	europe	UK	cultivated
240	PI_423632	PI_423632_S29_R1_001_cutadapt_bowtie2_sort_rg_marked.bam	4	tbr	KAMERAZ	europe	russia	cultivated
241	PI_423648	PI_423648_S3_R1_001_cutadapt_bowtie2_sort_rg_marked.bam	4	tbr	SASKIA	europe	netherlands	cultivated
242	PI_423649	PI_423649_S6_R1_001_cutadapt_bowtie2_sort_rg_marked.bam	4	tbr	VOKAL	europe	netherlands	cultivated
243	PI_423661	PI_423661_S63_R1_001_cutadapt_bowtie2_sort_rg_marked.bam	4	tbr	EIGENHEIMER	europe	netherlands	cultivated
244	PI_423662	PI_423662_S2_R1_001_cutadapt_bowtie2_sort_rg_marked.bam	4	tbr	LIBERTAS	europe	netherlands	cultivated
245	PI_423670	PI_423670_S15_R1_001_cutadapt_bowtie2_sort_rg_marked.bam	4	tbr	VIVAKS	europe	netherlands	cultivated
246	PI_451705	PI_451705_S65_R1_001_cutadapt_bowtie2_sort_rg_marked.bam	4	tbr	MARIS BARD	europe	UK	cultivated
247	PI_451707	PI_451707_S78_R1_001_cutadapt_bowtie2_sort_rg_marked.bam	4	tbr	PENTLAND DELL	europe	UK	cultivated
248	PI_475776	PI_475776_S72_R1_001_cutadapt_bowtie2_sort_rg_marked.bam	4	tbr	PENTLAND ACE	europe	UK	cultivated
249	PI_518592	PI_518592_S7_R1_001_cutadapt_bowtie2_sort_rg_marked.bam	4	tbr	PAPA AMARGA	South American	uruguay	cultivated
250	PI_527897	PI_527897_S52_R1_001_cutadapt_bowtie2_sort_rg_marked.bam	4	tbr	DRAYTON	europe	UK	cultivated
251	PI_527922	PI_527922_S70_R1_001_cutadapt_bowtie2_sort_rg_marked.bam	4	tbr	JASMIN	europe	poland	cultivated
252	PI_527929	PI_527929_S95_R1_001_cutadapt_bowtie2_sort_rg_marked.bam	4	tbr	SUPER	europe	romania	cultivated
253	PI_527977	PI_527977_S82_R1_001_cutadapt_bowtie2_sort_rg_marked.bam	4	tbr	LOW BAY	South American	chile	landrace
254	PI_537040	PI_537040_S47_R1_001_cutadapt_bowtie2_sort_rg_marked.bam	4	tbr	KINGSTON	europe	UK	cultivated
255	PI_587046	PI_587046_S24_R1_001_cutadapt_bowtie2_sort_rg_marked.bam	4	tbr	UKAMA	europe	netherlands	cultivated
256	PI_587050	PI_587050_S23_R1_001_cutadapt_bowtie2_sort_rg_marked.bam	4	tbr	URAN	europe	poland	cultivated
257	PI_587051	PI_587051_S42_R1_001_cutadapt_bowtie2_sort_rg_marked.bam	4	tbr	CORINE	europe	netherlands	cultivated
258	PI_587065	PI_587065_S4_R1_001_cutadapt_bowtie2_sort_rg_marked.bam	4	tbr	ANETT	europe	germany	cultivated
259	PI_587068	PI_587068_S30_R1_001_cutadapt_bowtie2_sort_rg_marked.bam	4	tbr	MARIA	South American	peru	cultivated
260	PI_587069	PI_587069_S10_R1_001_cutadapt_bowtie2_sort_rg_marked.bam	4	tbr	SANTA CATALINA	South American	ecuador	cultivated
261	PI_587073	PI_587073_S6_R1_001_cutadapt_bowtie2_sort_rg_marked.bam	4	tbr	GABRIELA	South American	peru	cultivated
262	PI_595403	PI_595403_S40_R1_001_cutadapt_bowtie2_sort_rg_marked.bam	4	tbr	POLIOT	europe	russia	cultivated
263	PI_595420	PI_595420_S19_R1_001_cutadapt_bowtie2_sort_rg_marked.bam	4	tbr	AURA	europe	france	cultivated
264	PI_595424	PI_595424_S93_R1_001_cutadapt_bowtie2_sort_rg_marked.bam	4	tbr	MANDEL	europe	sweden	cultivated
265	PI_595425	PI_595425_S1_R1_001_cutadapt_bowtie2_sort_rg_marked.bam	4	tbr	MARIJKE	europe	netherlands	cultivated
266	PI_595444	PI_595444_S17_R1_001_cutadapt_bowtie2_sort_rg_marked.bam	4	tbr adg	QOYLLU	South American	bolivia	landrace
267	PI_595492	PI_595492_S40_R1_001_cutadapt_bowtie2_sort_rg_marked.bam	4	tbr	GUADACHO - SC 4425	South American	chile	landrace
268	PI_599259	PI_599259_S34_R1_001_cutadapt_bowtie2_sort_rg_marked.bam	2	juz	LUCKY	South American	bolivia	landrace
269	PI_607472	PI_607472_S28_R1_001_cutadapt_bowtie2_sort_rg_marked.bam	4	tbr adg	KHUCHI AKITA	South American	bolivia	landrace
270	PI_607480	PI_607480_S21_R1_001_cutadapt_bowtie2_sort_rg_marked.bam	4	tbr	JAMTLANDS VIT	europe	sweden	cultivated
271	PI_607483	PI_607483_S39_R1_001_cutadapt_bowtie2_sort_rg_marked.bam	4	tbr	BJORNA	europe	sweden	cultivated
272	PI_607494	PI_607494_S23_R1_001_cutadapt_bowtie2_sort_rg_marked.bam	4	tbr	AMARILLO	South American	peru	cultivated
273	PI_607497	PI_607497_S22_R1_001_cutadapt_bowtie2_sort_rg_marked.bam	4	tbr	PAPA CHONCA	South American	chile	landrace
274	PI_619152	PI_619152_S28_R1_001_cutadapt_bowtie2_sort_rg_marked.bam	4	tbr	MEDUZA	europe	poland	cultivated
275	PI_619156	PI_619156_S34_R1_001_cutadapt_bowtie2_sort_rg_marked.bam	4	tbr	DOBRO	europe	belarus	cultivated
276	PI_619158	PI_619158_S40_R1_001_cutadapt_bowtie2_sort_rg_marked.bam	4	tbr	V-3	South American	peru	cultivated
277	PI_629020	PI_629020_S19_R1_001_cutadapt_bowtie2_sort_rg_marked.bam	4	tbr	CYNTHIA	europe	france	cultivated
278	PI_631419	PI_631419_S68_R1_001_cutadapt_bowtie2_sort_rg_marked.bam	4	tbr adg	GARHUASH HUAYRO	South American	peru	landrace
279	PI_634530	PI_634530_S11_R1_001_cutadapt_bowtie2_sort_rg_marked.bam	4	tbr	REICHE	South American	peru	cultivated
280	PI_634533	PI_634533_S33_R1_001_cutadapt_bowtie2_sort_rg_marked.bam	4	tbr	PERRICHOLI	South American	peru	cultivated
281	PI_642184	PI_642184_S1_R1_001_cutadapt_bowtie2_sort_rg_marked.bam	4	tbr adg	SUYTU VILQUINA	South American	peru	landrace
282	PI_642186	PI_642186_S13_R1_001_cutadapt_bowtie2_sort_rg_marked.bam	4	tbr adg	YUGUIMA	South American	peru	landrace
283	PI_642187	PI_642187_S19_R1_001_cutadapt_bowtie2_sort_rg_marked.bam	4	tbr adg	PACIENCIA	South American	peru	landrace
284	PI_642189	PI_642189_S31_R1_001_cutadapt_bowtie2_sort_rg_marked.bam	4	tbr adg	RUBI	South American	colombia	landrace
285	PI_642429	PI_642429_S9_R1_001_cutadapt_bowtie2_sort_rg_marked.bam	4	tbr	UNICA	South American	peru	cultivated
286	PI_642438	PI_642438_S37_R1_001_cutadapt_bowtie2_sort_rg_marked.bam	4	tbr adg	ALCCA IMILLA	South American	peru	landrace
287	PI_642441	PI_642441_S2_R1_001_cutadapt_bowtie2_sort_rg_marked.bam	4	tbr adg	HUICHIRI	South American	peru	landrace
288	PI_642442	PI_642442_S27_R1_001_cutadapt_bowtie2_sort_rg_marked.bam	4	tbr adg	JANCKO PHINU	South American	bolivia	landrace
289	PI_642444	PI_642444_S14_R1_001_cutadapt_bowtie2_sort_rg_marked.bam	4	tbr adg	PUCA TROMBOS	South American	peru	landrace
290	PI_642446	PI_642446_S20_R1_001_cutadapt_bowtie2_sort_rg_marked.bam	4	tbr adg	OKELLA QUEHUILLO	South American	peru	landrace
291	PI_657132	PI_657132_S39_R1_001_cutadapt_bowtie2_sort_rg_marked.bam	4	tbr	SANTA ANA	South American	peru	cultivated
292	PI_657134	PI_657134_S26_R1_001_cutadapt_bowtie2_sort_rg_marked.bam	4	tbr	KINIGI	South American	peru	cultivated
293	PI_657135	PI_657135_S4_R1_001_cutadapt_bowtie2_sort_rg_marked.bam	4	tbr	MUZIRANZARA	South American	peru	cultivated
294	PI_657139	PI_657139_S28_R1_001_cutadapt_bowtie2_sort_rg_marked.bam	4	tbr	ENFULA	South American	peru	cultivated
295	PI_657147	PI_657147_S35_R1_001_cutadapt_bowtie2_sort_rg_marked.bam	4	tbr adg	ALCA TARMA	South American	peru	landrace
296	PI_658588	PI_658588_S79_R1_001_cutadapt_bowtie2_sort_rg_marked.bam	4	tbr	ASTER	europe	poland	cultivated
297	PI_661981	PI_661981_S47_R1_001_cutadapt_bowtie2_sort_rg_marked.bam	4	tbr	ASUN	europe	spain	cultivated
298	PI_661982	PI_661982_S32_R1_001_cutadapt_bowtie2_sort_rg_marked.bam	4	tbr	BARBARA	europe	germany	cultivated
299	PI_661983	PI_661983_S38_R1_001_cutadapt_bowtie2_sort_rg_marked.bam	4	tbr	BZURA	europe	poland	cultivated
300	PI_661984	PI_661984_S6_R1_001_cutadapt_bowtie2_sort_rg_marked.bam	4	tbr	FINA DE CARBALLO	europe	spain	cultivated
301	PI_661986	PI_661986_S12_R1_001_cutadapt_bowtie2_sort_rg_marked.bam	4	tbr	GOYA	europe	spain	cultivated
302	PI_661990	PI_661990_S36_R1_001_cutadapt_bowtie2_sort_rg_marked.bam	4	tbr	PASTUSA SUPREMA	South American	colombia	cultivated
303	PI_662322	PI_662322_S72_R1_001_cutadapt_bowtie2_sort_rg_marked.bam	4	tbr	PICASSO	europe	netherlands	cultivated
304	PI_662324	PI_662324_S3_R1_001_cutadapt_bowtie2_sort_rg_marked.bam	4	tbr adg	LLUNCHUYWAQACHI	South American	peru	landrace
305	PI_662325	PI_662325_S42_R1_001_cutadapt_bowtie2_sort_rg_marked.bam	4	tbr	BLUE SHETLAND	North America	canada	cultivated
306	PI_664474	PI_664474_S15_R1_001_cutadapt_bowtie2_sort_rg_marked.bam	4	tbr adg	YANAMATA	South American	peru	landrace
307	PI_664475	PI_664475_S21_R1_001_cutadapt_bowtie2_sort_rg_marked.bam	4	tbr adg	CHIQUILLA PITIQUINA	South American	peru	landrace
308	PI_664476	PI_664476_S27_R1_001_cutadapt_bowtie2_sort_rg_marked.bam	4	tbr adg	AMBAR	South American	peru	landrace
309	PI_665407	PI_665407_S9_R1_001_cutadapt_bowtie2_sort_rg_marked.bam	4	tbr adg	YEMA DE HUEVO	South American	colombia	landrace
310	PI_666142	PI_666142_S41_R1_001_cutadapt_bowtie2_sort_rg_marked.bam	4	tbr	MYATTS ASHLEAF	europe	UK	cultivated
311	PI_666963	PI_666963_S16_R1_001_cutadapt_bowtie2_sort_rg_marked.bam	4	tbr	SANTE	europe	netherlands	cultivated
312	PI_669829	PI_669829_S39_R1_001_cutadapt_bowtie2_sort_rg_marked.bam	4	tbr adg	HUAYCU	South American	bolivia	landrace
313	PI_673449	PI_673449_S60_R1_001_cutadapt_bowtie2_sort_rg_marked.bam	4	tbr	ERAMOSA	North America	canada	cultivated
314	PI_673450	PI_673450_S44_R1_001_cutadapt_bowtie2_sort_rg_marked.bam	4	tbr	ELMER'S BLUE	North American	canada	cultivated
315	PI245792	PI245792_S11_R1_001_cutadapt_bowtie2_sort_rg_marked.bam	4	tbr	MORADA OJUDA	South American	chile	cultivated
316	PI537035	PI537035_S39_R1_001_cutadapt_bowtie2_sort_rg_marked.bam	4	tbr	STOBRAWA	europe	poland	cultivated
317	PI587063	PI587063_S2_R1_001_cutadapt_bowtie2_sort_rg_marked.bam	4	tbr	PRIEKULSKY RANNY	europe	latvia	cultivated
318	PI587064	PI587064_S32_R1_001_cutadapt_bowtie2_sort_rg_marked.bam	4	tbr	NEVSKII	europe	russia	cultivated
319	PI587067	PI587067_S47_R1_001_cutadapt_bowtie2_sort_rg_marked.bam	4	tbr	TOLLOCAN	South American	mexico	cultivated
320	PI595438	PI595438_S35_R1_001_cutadapt_bowtie2_sort_rg_marked.bam	2	juz	AZUL LUK'I.1	South American	bolivia	landrace
321	PI607491	PI607491_S14_R1_001_cutadapt_bowtie2_sort_rg_marked.bam	4	tbr adg	CUCHIPA ISMAYNIN - SA-1356	South American	peru	landrace
322	PI619137	PI619137_S37_R1_001_cutadapt_bowtie2_sort_rg_marked.bam	4	tbr adg	SA-450.1	South American	peru	landrace
323	PI619142	PI619142_S31_R1_001_cutadapt_bowtie2_sort_rg_marked.bam	4	tbr adg	BADULAQUE.1	SouthAmerican	peru	landrace
324	PI633601	PI633601_S12_R1_001_cutadapt_bowtie2_sort_rg_marked.bam	4	tbr	EDEN	europe	UK	cultivated
325	PI642181	PI642181_S36_R1_001_cutadapt_bowtie2_sort_rg_marked.bam	4	tbr adg	YURACC CCOMPIS.1	South American	peru	landrace
326	PI645563	PI645563_S23_R1_001_cutadapt_bowtie2_sort_rg_marked.bam	4	tbr adg	CASA BLANCA.1	South American	peru	landrace
327	PI654354	PI654354_S21_R1_001_cutadapt_bowtie2_sort_rg_marked.bam	4	tbr adg	SOLIMAN	South American	bolivia	landrace
328	PI660358	PI660358_S27_R1_001_cutadapt_bowtie2_sort_rg_marked.bam	4	tbr adg	LEONA - OCH 10229	South American	ecuador	landrace
329	PI660359	PI660359_S26_R1_001_cutadapt_bowtie2_sort_rg_marked.bam	4	tbr adg	NEGRA OJOSA.1	South American	argentina	landrace
